# Supplementary material
Source: PubMed Central journal article supplement (PMC5871871)
Supplement: NIHMS950244-supplement-Supplement.pdf [file NIHMS950244-supplement-Supplement.pdf]

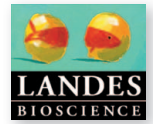

## **Supplemental Material to:**

**Leon H. Chew, Dheva Setiaputra, Daniel J. Klionsky,  
Calvin K. Yip**

**Structural characterization of the *Saccharomyces cerevisiae*  
autophagy regulatory complex Atg17-Atg31-Atg29**

**Autophagy 2013; 9(10)**

**<http://dx.doi.org/10.4161/auto.25687>**

**[www.landesbioscience.com/journals/autophagy/article/25687](http://www.landesbioscience.com/journals/autophagy/article/25687)**

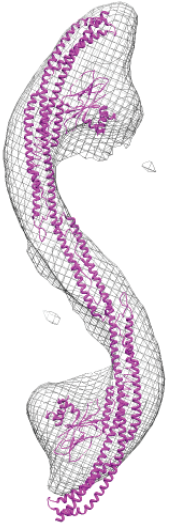

90°  
↻

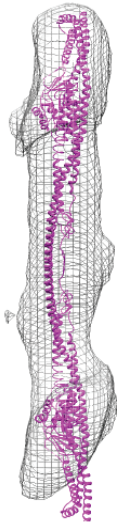

90°  
↻

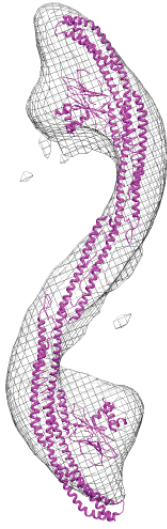

90°  
↻

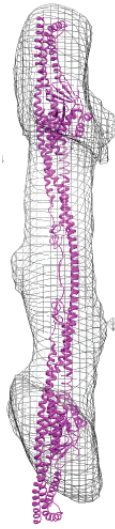

90°  
↻

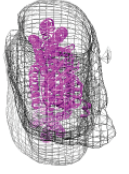

**Figure S1.** Docking of the crystal structure of the core Atg17-Atg31-Atg29 complex from *L. thermotolerans* (PDB accession code 4HPQ) into the EM density map of the *S. cerevisiae* complex. Docking was performed using UCSF Chimera and the different panels represent the docked solution viewed in different orientations.

**Table S1.** Mass spectrometry of TAP purified Atg17-Atg31-Atg29.

| <b>Protein</b>   | <b>Number of peptides</b> | <b>Coverage by amino acid count (%)</b> |
|------------------|---------------------------|-----------------------------------------|
| Atg17 (48.7 kDa) | 27                        | 66.43                                   |
| Atg29 (24.7 kDa) | 9                         | 63.38                                   |
| Atg31 (22.2 kDa) | 9                         | 63.78                                   |
